# Supplementary material
Source: publisher site journal article supplement (https://www.dovepress.com/article/316078)
Supplement: Supplementary file 1 [file get_supplementary_file.php]

## Supplementary Materials

### Nitric oxide/L-arginine-related pathway metabolites are altered in patients after myocardial infarction and predict adverse outcomes

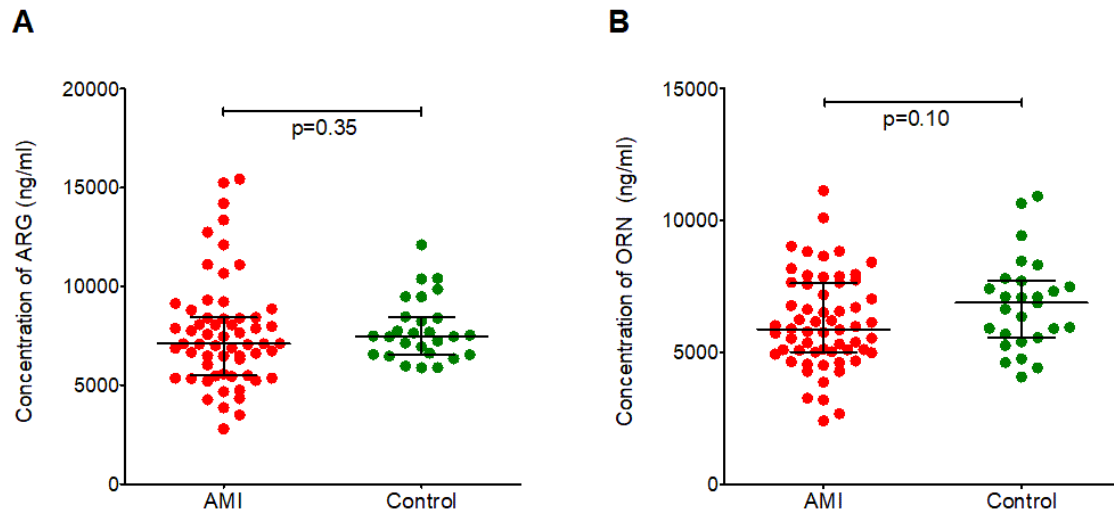

**Figure S1.** Endogenous NO/L-Arginine-related pathway metabolites plasma concentrations in patients with acute myocardial infarction (AMI), compared to healthy controls. A: Arginine (ARG), B: Ornithine (ORN).

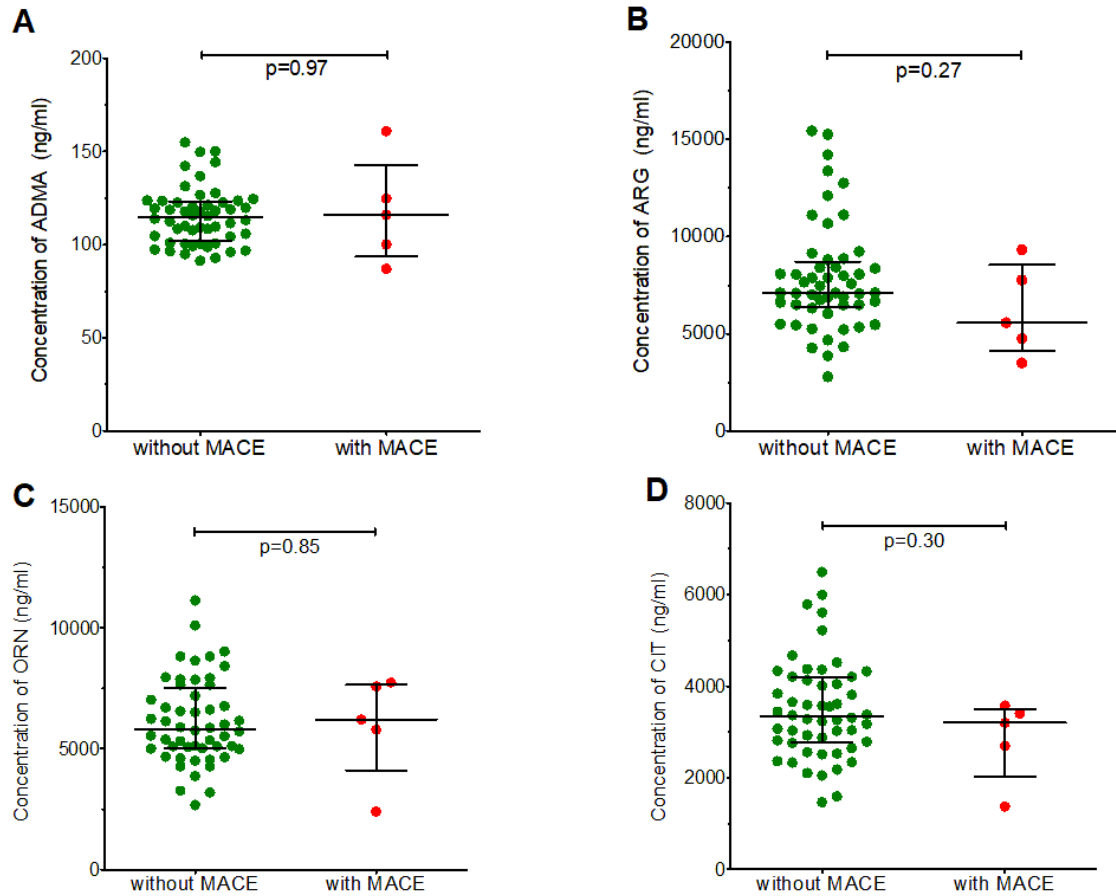

**Figure S2.** Concentrations of endogenous NO/L-Arginine-related pathway metabolites in patients after acute myocardial infarction (AMI) who developed major adverse cardiovascular events (MACE), compared to those who did not during the median follow-up of 3.5 years. A: asymmetric dimethylarginine (ADMA), B: Arginine (ARG), C: Ornithine (ORN), D: Citrulline (CIT).
